# Supplementary material
Source: PubMed Central journal article supplement (PMC6600185)
Supplement: JVI.00542-19-s0001.pdf [file JVI.00542-19-s0001.pdf]

**Table S1. The Wcs proteins used for phylogenetic analysis**

| <b>Protein</b> | <b>Accession No.</b> | <b>Species Name</b>           | <b>Order</b>    |
|----------------|----------------------|-------------------------------|-----------------|
| MmuWcs1        | NP_080156.2          | <i>Mus musculus</i>           | Rodentia        |
| MpuWcs1        | XP_004767240.1       | <i>Mustela putorius</i>       | Carnivora       |
| CbaWcs1        | XP_010945334.1       | <i>Camelus bactrianus</i>     | Cetartiodactyla |
| PalWcs1        | XP_006905058.1       | <i>Pteropus alecto</i>        | Chiroptera      |
| EprWcs1        | XP_008505767.1       | <i>Equus przewalskii</i>      | Perissodactyla  |
| MdoWcs2        | XP_007493718.1       | <i>Monodelphis domestica</i>  | Didelphimorphia |
| PciWcs2        | XP_020862835.1       | <i>Phascolarctos cinereus</i> | Diprotodontia   |

**Table S2. The representative retrovirus gag and Fv1 sequences used for phylogenetic reconstruction**

| <b>Name</b>                                | <b>Abbreviation</b> | <b>Accession No./Source</b> |
|--------------------------------------------|---------------------|-----------------------------|
| Meleagris endogenous retrovirus            | Meleagris-ERV       | ADDD01127175.1              |
| Mus dunni endogenous virus                 | MDEV                | AF053745                    |
| Walleye epidermal hyperplasia virus 1      | WEHV-1              | AF133051                    |
| Walleye epidermal hyperplasia virus 2      | WEHV-2              | AF133052                    |
| Koala retrovirus                           | KoRV                | AF151794.2                  |
| Simian immunodeficiency virus              | SIVcol              | AF301156.1                  |
| Python molurus endogenous retrovirus       | PyERV               | AF500296.1                  |
| Danio rerio endogenous retrovirus          | ZFERV               | AF503912.1                  |
| Porcine endogenous retrovirus C            | PERV-C              | AJ293656.1                  |
| Xenopus laevis endogenous retrovirus 1     | Xen-1               | AJ506107.1                  |
| Porcine endogenous retrovirus B            | PERV-B              | AY099324                    |
| Baboon endogenous virus strain M7          | BaEV                | D10032.1                    |
| Human T-lymphotropic virus 3               | HTLV-3              | DQ093792.1                  |
| Atlantic salmon swim bladder sarcoma virus | SSSV                | DQ174103.1                  |
| Human immunodeficiency virus 1             | HIV-1               | EF029066.1                  |
| Bos taurus endogenous virus beta3          | BERV-beta3          | EF030818.1                  |
| Human T-lymphotropic virus 4               | HTLV-4              | EF488483.1                  |
| Simian immunodeficiency virus              | SIVcpz              | EF535994.1                  |
| Spider monkey simian foamy virus           | SFVspm              | EU010385.1                  |
| Western lowland gorilla simian foamy virus | SFVgor              | HM245790.1                  |
| Rhinolophus ferrumequinum retrovirus       | RfRV                | JQ303225.1                  |
| Simian retrovirus 1                        | SRV-1               | M11841.1                    |
| Simian retrovirus 2                        | SRV-2               | M16605.1                    |
| Squirrel monkey retrovirus-H               | SMRV-H              | M23385.1                    |
| Chimpanzee simian foamy virus              | SFVcpz              | NC_001364.1                 |
| Rous sarcoma virus                         | RSV                 | NC_001407.1                 |
| Bovine immunodeficiency virus              | BIV                 | NC_001413.1                 |
| Bovine leukemia virus                      | BLV                 | NC_001414.1                 |
| Human T-cell leukemia virus type I         | HTLV-1              | NC_001436.1                 |
| Equine infectious anemia virus             | EIAV                | NC_001450.1                 |
| Caprine arthritis encephalitis virus       | CAEV                | NC_001463.1                 |
| Feline immunodeficiency virus              | FIV                 | NC_001482.1                 |
| Human T-lymphotropic virus 2               | HTLV-2              | NC_001488.1                 |
| Jaagsiekte sheep retrovirus                | JSRV                | NC_001494.1                 |
| Moloney murine leukemia virus              | Mo-MLV              | NC_001501.1                 |
| Mouse mammary tumor virus                  | MMTV                | NC_001503.1                 |
| Ovine lentivirus                           | SRLV                | NC_001511.1                 |
| Human immunodeficiency virus 2             | HIV-2               | NC_001722.1                 |
| Snakehead retrovirus                       | SnRV                | NC_001724.1                 |
| Bovine foamy virus                         | BFV                 | NC_001831.1                 |
| Walleye dermal sarcoma virus               | WDSV                | NC_001867.1                 |
| Gibbon ape leukemia virus                  | GaLV                | NC_001885.3                 |
| Feline leukemia virus                      | FeLV                | NC_001940.1                 |
| Equine foamy virus                         | EFV                 | NC_002201.1                 |
| Reticuloendotheliosis virus                | REV                 | NC_006934                   |
| Woolly monkey sarcoma virus                | WMSV                | NC_009424                   |
| RD114 retrovirus                           | RD114               | NC_009889.1                 |

|                                                       |           |                |
|-------------------------------------------------------|-----------|----------------|
| Macaque simian foamy virus                            | SFVmac    | NC_010819.1    |
| African green monkey simian foamy virus               | SFVagm    | NC_010820.1    |
| Avian leukemia virus                                  | ALV       | NC_015116.1    |
| Feline foamy virus                                    | FFV       | NC_001871.1    |
| Lymphoproliferative disease virus                     | LDV       | U09568.1       |
| Jembrana disease virus                                | JDV       | U21603.1       |
| Mus musculus endogenous retrovirus                    | MuERV-L   | Y12713.1       |
| Friend virus susceptibility protein 1 of Mus musculus | MmuFv1    | NP_034374.2    |
| Friend virus susceptibility protein 1 of Mus caroli   | McaFv1    | XP_021019979.1 |
| Coelacanth endogenous foamy-like virus                | CoeEFV    | Ref.1          |
| Human endogenous retrovirus T                         | HERV-T    | Ref.2          |
| Human endogenous retrovirus 3                         | HERV-3    | Ref.2          |
| Human endogenous retrovirus 1                         | HERV-1    | Ref.2          |
| Human endogenous retrovirus I                         | HERV-I    | Ref.2          |
| Human endogenous retrovirus E                         | HERV-E    | Ref.2          |
| Human endogenous retrovirus HARLEQUIN                 | HARLEQUIN | Ref.2          |
| Pseudoautosomal boundary-like sequence                | PABL      | Ref.2          |
| Human endogenous retrovirus ADP                       | HERV-ADP  | Ref.2          |
| Human endogenous retrovirus IP                        | HERV-IP   | Ref.2          |
| Human endogenous retrovirus Fb                        | HERV-Fb   | Ref.2          |
| Human endogenous retrovirus H                         | HERV-H    | Ref.2          |
| Human endogenous retrovirus H48                       | HERV-H48  | Ref.2          |
| Human endogenous retrovirus LTR46                     | LTR46     | Ref.2          |
| Human endogenous retrovirus Fa                        | HERV-Fa   | Ref.2          |
| Human endogenous retrovirus Fc                        | HERV-Fc   | Ref.2          |
| Human endogenous retrovirus MER84                     | MER84     | Ref.2          |
| Human endogenous retrovirus PRIMA4                    | PRIMA4    | Ref.2          |
| Human endogenous retrovirus FRD                       | HERV-FRD  | Ref.2          |
| Human endogenous retrovirus 4                         | HERV-4    | Ref.2          |
| Human endogenous retrovirus-like sequences P2         | HUERSP2   | Ref.2          |
| Human endogenous retrovirus MER52                     | MER52     | Ref.2          |
| Human endogenous retrovirus-like sequences P3         | HUERSP3   | Ref.2          |
| Human endogenous retrovirus LTR25                     | LTR25     | Ref.2          |
| Human endogenous retrovirus 9                         | HERV-9    | Ref.2          |
| Human endogenous retrovirus W                         | HERV-W    | Ref.2          |
| Human endogenous retrovirus 30                        | HERV-30   | Ref.2          |
| Human endogenous retrovirus PRIMA41                   | PRIMA41   | Ref.2          |
| Human endogenous retrovirus HEPSI3                    | HEPSI3    | Ref.2          |
| Human endogenous retrovirus HEPSI1                    | HEPSI1    | Ref.2          |
| Human endogenous retrovirus HEPSI2                    | HEPSI2    | Ref.2          |
| Human endogenous retrovirus MER34                     | MER34     | Ref.2          |
| Human MMTV-like 1                                     | HML-1     | Ref.2          |
| Human MMTV-like 3                                     | HML-3     | Ref.2          |
| Human MMTV-like 9                                     | HML-9     | Ref.2          |
| Human MMTV-like 2                                     | HML-2     | Ref.2          |
| Human MMTV-like 4                                     | HML-4     | Ref.2          |
| Human MMTV-like 7                                     | HML-7     | Ref.2          |
| Human MMTV-like 8                                     | HML-8     | Ref.2          |
| Human MMTV-like 5                                     | HML-5     | Ref.2          |
| Human MMTV-like 6                                     | HML-6     | Ref.2          |
| Human endogenous retrovirus L                         | HERV-L    | Ref.2          |

|                                                            |                 |       |
|------------------------------------------------------------|-----------------|-------|
| Human endogenous retrovirus S                              | HERV-S          | Ref.2 |
| Gallus endogenous retrovirus R                             | Gallus-R        | Ref.3 |
| Melopsittacus endogenous retrovirus R                      | Melopsittacus-R | Ref.3 |
| Taeniopygia endogenous retrovirus R                        | Taeniopygia-R   | Ref.3 |
| Anas endogenous retrovirus R                               | Anas-R          | Ref.3 |
| Falco endogenous retrovirus H                              | Falco-H         | Ref.3 |
| Melopsittacus endogenous retrovirus H                      | Melopsittacus-H | Ref.3 |
| Taeniopygia endogenous retrovirus H                        | Taeniopygia-H   | Ref.3 |
| Columba endogenous retrovirus H                            | Columba-H       | Ref.3 |
| Pseudopodoces endogenous retrovirus H                      | Pseudopodoces-H | Ref.3 |
| <i>Gallus gallus</i> endogenous retrovirus 10              | GGERV-10        | Ref.3 |
| <i>Gallus gallus</i> endogenous retrovirus LA              | GGERV-LA        | Ref.3 |
| <i>Zonotrichia albicollis</i> endogenous retrovirus type A | ZAERV-A         | Ref.3 |

---

1. Han GZ, Worobey M. 2012. An endogenous foamy-like viral element in the coelacanth genome. *PLoS Pathog.* 8:e1002790.
2. Vargiu L, Rodriguez-Tomé P, Sperber GO, Cadeddu M, Grandi N, Blikstad V, Tramontano E, Blomberg J. 2016. Classification and characterization of human endogenous retroviruses; mosaic forms are common. *Retrovirology.* 13:7.
3. Niewiadomska AM, Gifford RJ. 2013. The extraordinary evolutionary history of the reticuloendotheliosis viruses. *PLoS Biol.* 11:e1001642.

**Table S3. The SRA accession number used for expression pattern analyses**

|            | <i>Mus musculus</i> | <i>Mustela putorius</i> | <i>Bos taurus</i> | <i>Hipposideros armiger</i> | <i>Equus caballus</i> | <i>Monodelphis domestica</i> | <i>Phascolarctos cinereus</i> |
|------------|---------------------|-------------------------|-------------------|-----------------------------|-----------------------|------------------------------|-------------------------------|
| Brain      | SRX5397290          | SRX3316193              | SRX211674         | SRX761339                   | SRX211684             | SRX217694                    | SRX501343                     |
| Liver      | SRX5391775          | SRX3316207              | SRX211579         | SRX764325                   | SRX211589             | SRX2704263                   | SRX501262                     |
| Kidney     | SRX5184837          | SRX3316202              | SRX211629         | SRX764324                   | SRX211641             | SRX2704259                   | SRX501314                     |
| Lung       | SRX5382226          | SRX3316212              | ERX480073         | SRX764326                   | NA                    | SRX3316214                   | SRX501320                     |
| Heart      | SRX5089077          | SRX3316197              | SRX1538121        | SRX764323                   | NA                    | SRX2704257                   | SRX501342                     |
| Spleen     | SRX4937288          | SRX112776               | SRX2506272        | SRX764328                   | NA                    | SRX290646                    | SRX500280                     |
| Muscle     | SRX5260775          | SRX3316217              | ERX480070         | SRX764327                   | SRX147023             | SRX3316219                   | NA                            |
| Testis     | SRX5382129          | SRX3316222              | SRX3766817        | NA                          | SRX3022257            | SRX3316223                   | NA                            |
| Blood      | SRX5282936          | SRX4948654              | SRX5062183        | NA                          | SRX147033             | SRX149629                    | NA                            |
| Lymph node | SRX4941344          | SRX112780               | SRX978280         | NA                          | NA                    | NA                           | NA                            |
| Skin       | SRX5305348          | SRX112815               | SRX5057749        | NA                          | ERX117850             | NA                           | NA                            |
| Placenta   | SRX5330873          | NA                      | SRX4551179        | NA                          | SRX128106             | SRX217696                    | NA                            |
| Pancreas   | SRX4900154          | SRX112782               | NA                | NA                          | NA                    | SRX290644                    | NA                            |

**Table S4. The 261 vertebrate proteomes used for the similarity search**

| <b>Species</b>                      | <b>Assembly No.</b> | <b>Assembly Level</b> | <b>Size(Mb)</b> | <b>Scaffolds</b> |
|-------------------------------------|---------------------|-----------------------|-----------------|------------------|
| Acanthisitta chloris                | GCA_000695815.1     | Scaffold              | 1035.88         | 53875            |
| Acanthochromis polyacanthus         | GCA_002109545.1     | Scaffold              | 991.585         | 30414            |
| Acinonyx jubatus                    | GCA_003709585.1     | Scaffold              | 2384.85         | 3220             |
| Ailuropoda melanoleuca              | GCA_000004335.1     | Scaffold              | 2299.51         | 81467            |
| Amazona aestiva                     | GCA_001420675.1     | Scaffold              | 1129.54         | 3232             |
| Amphiprion ocellaris                | GCA_002776465.1     | Scaffold              | 880.721         | 6405             |
| Anas platyrhynchos                  | GCA_003850225.1     | Chromosome            | 1126.18         | 2150             |
| Anser cygnoides domesticus          | GCA_000971095.1     | Scaffold              | 1119.15         | 7593             |
| Antrostomus carolinensis            | GCA_000700745.1     | Scaffold              | 1119.68         | 70122            |
| Aotus nancymae                      | GCA_000952055.2     | Scaffold              | 2861.68         | 28922            |
| Apaloderma vittatum                 | GCA_000703405.1     | Scaffold              | 1070.84         | 54728            |
| Aptenodytes forsteri                | GCA_000699145.1     | Scaffold              | 1254.35         | 10672            |
| Apteryx australis mantelli          | GCA_001039765.1     | Scaffold              | 1523.97         | 24720            |
| Aquila chrysaetos canadensis        | GCA_000766835.1     | Scaffold              | 1192.74         | 1142             |
| Astyanax mexicanus                  | GCA_000372685.2     | Chromosome            | 1335.24         | 2415             |
| Austrofundulus limnaeus             | GCA_001266775.1     | Scaffold              | 866.963         | 29785            |
| Balaenoptera acutorostrata scammoni | GCA_000493695.1     | Scaffold              | 2431.69         | 10776            |
| Balearica regulorum gibbericeps     | GCA_000709895.1     | Scaffold              | 1127.62         | 53491            |
| Bambusicola thoracicus              | GCA_002909625.1     | Scaffold              | 1032.3          | 163748           |
| Bison bison bison                   | GCA_000754665.1     | Scaffold              | 2828.03         | 128431           |
| Boleophthalmus pectinirostris       | GCA_000788275.1     | Scaffold              | 955.752         | 16620            |
| Bos indicus                         | GCA_000247795.2     | Chromosome            | 2673.97         | 32               |
| Bos mutus                           | GCA_000298355.1     | Scaffold              | 2645.16         | 41192            |
| Bos taurus                          | GCA_002263795.2     | Chromosome            | 2715.85         | 2211             |
| Bubalus bubalis                     | GCA_003121395.1     | Chromosome            | 2655.78         | 509              |
| Buceros rhinoceros silvestris       | GCA_000710305.1     | Scaffold              | 1065.78         | 62257            |
| Calidris pugnax                     | GCA_001431845.1     | Scaffold              | 1229.09         | 3753             |
| Callipepla squamata                 | GCA_002218305.1     | Scaffold              | 1045.28         | 34302            |
| Callithrix jacchus                  | GCA_000004665.1     | Chromosome            | 2914.96         | 16399            |
| Callorhinchus milii                 | GCA_000165045.2     | Scaffold              | 974.499         | 21204            |
| Calypte anna                        | GCA_000699085.1     | Scaffold              | 1105.68         | 54736            |
| Camelus bactrianus                  | GCA_000767855.1     | Scaffold              | 1992.66         | 35455            |
| Camelus dromedarius                 | GCA_000767585.1     | Scaffold              | 2004.06         | 32573            |
| Camelus ferus                       | GCA_000311805.2     | Scaffold              | 2009.19         | 13334            |
| Canis lupus dingo                   | GCA_003254725.1     | Scaffold              | 2439.83         | 2444             |
| Canis lupus familiaris              | GCA_000002285.2     | Chromosome            | 2410.98         | 3310             |
| Capra hircus                        | GCA_001704415.1     | Chromosome            | 2922.81         | 29907            |
| Cariama cristata                    | GCA_000690535.1     | Scaffold              | 1132.25         | 53474            |
| Carlito syrichta                    | GCA_000164805.2     | Scaffold              | 3453.86         | 337189           |
| Castor canadensis                   | GCA_001984765.1     | Scaffold              | 2518.31         | 21157            |
| Cathartes aura                      | GCA_000699945.1     | Scaffold              | 1152.57         | 104141           |
| Cavia porcellus                     | GCA_000151735.1     | Scaffold              | 2723.22         | 3144             |
| Cebus capucinus imitator            | GCA_001604975.1     | Scaffold              | 2717.7          | 7156             |

|                                     |                 |            |         |         |
|-------------------------------------|-----------------|------------|---------|---------|
| <i>Ceratotherium simum simum</i>    | GCA_000283155.1 | Scaffold   | 2464.37 | 3087    |
| <i>Cercocebus atys</i>              | GCA_000955945.1 | Scaffold   | 2848.25 | 11433   |
| <i>Cervus elaphus hippelaphus</i>   | GCA_002197005.1 | Chromosome | 3438.62 | 11479   |
| <i>Chaetura pelagica</i>            | GCA_000747805.1 | Scaffold   | 1119.19 | 19072   |
| <i>Charadrius vociferus</i>         | GCA_000708025.2 | Scaffold   | 1219.86 | 15167   |
| <i>Chelonia mydas</i>               | GCA_000344595.1 | Scaffold   | 2208.41 | 140023  |
| <i>Chinchilla lanigera</i>          | GCA_000276665.1 | Scaffold   | 2390.87 | 2839    |
| <i>Chlamydotis macqueenii</i>       | GCA_000695195.1 | Scaffold   | 1086.57 | 59693   |
| <i>Chlorocebus sabaeus</i>          | GCA_000409795.2 | Chromosome | 2789.66 | 2022    |
| <i>Chrysemys picta bellii</i>       | GCA_000241765.2 | Chromosome | 2365.77 | 78631   |
| <i>Chrysochloris asiatica</i>       | GCF_000296735.1 | Scaffold   | 4750.46 | 20500   |
| <i>Clupea harengus</i>              | GCA_000966335.1 | Scaffold   | 807.712 | 6915    |
| <i>Colinus virginianus</i>          | GCA_000599465.2 | Scaffold   | 1254.15 | 42369   |
| <i>Colius striatus</i>              | GCA_000690715.1 | Scaffold   | 1075.93 | 70188   |
| <i>Colobus angolensis palliatus</i> | GCA_000951035.1 | Scaffold   | 2970.12 | 13124   |
| <i>Columba livia</i>                | GCA_000337935.1 | Scaffold   | 1107.99 | 14923   |
| <i>Condylura cristata</i>           | GCA_000260355.1 | Scaffold   | 1769.66 | 2040    |
| <i>Corvus brachyrhynchos</i>        | GCA_000691975.1 | Scaffold   | 1091.31 | 10547   |
| <i>Corvus cornix cornix</i>         | GCA_000738735.2 | Scaffold   | 1042.28 | 113     |
| <i>Coturnix japonica</i>            | GCA_001577835.1 | Chromosome | 927.657 | 2531    |
| <i>Cricetulus griseus</i>           | GCA_000223135.1 | Scaffold   | 2399.79 | 109152  |
| <i>Crocodylus porosus</i>           | GCA_001723895.1 | Scaffold   | 2049.54 | 70      |
| <i>Cuculus canorus</i>              | GCA_000709325.1 | Scaffold   | 1153.89 | 14930   |
| <i>Cyanistes caeruleus</i>          | GCA_002901205.1 | Scaffold   | 1186.98 | 29297   |
| <i>Cynoglossus semilaevis</i>       | GCA_000523025.1 | Chromosome | 470.199 | 31181   |
| <i>Cyprinodon variegatus</i>        | GCA_000732505.1 | Scaffold   | 1035.18 | 9259    |
| <i>Cyprinus carpio</i>              | GCA_000951615.2 | Chromosome | 1713.66 | 9378    |
| <i>Danio rerio</i>                  | GCA_000002035.4 | Scaffold   | 1411.76 | 32031   |
| <i>Dasypus novemcinctus</i>         | GCA_000208655.2 | Scaffold   | 1679.2  | 2848    |
| <i>Delphinapterus leucas</i>        | GCA_002288925.2 | Scaffold   | 2358.52 | 6972    |
| <i>Desmodus rotundus</i>            | GCA_002940915.2 | Scaffold   | 2063.81 | 29801   |
| <i>Dipodomys ordii</i>              | GCA_000151885.2 | Scaffold   | 2236.37 | 65193   |
| <i>Echinops telfairi</i>            | GCA_000313985.1 | Scaffold   | 2947.02 | 8402    |
| <i>Egretta garzetta</i>             | GCA_000687185.1 | Scaffold   | 1206.5  | 11791   |
| <i>Elephantulus edwardii</i>        | GCA_000299155.1 | Scaffold   | 3843.98 | 8768    |
| <i>Enhydra lutris kenyonii</i>      | GCA_002288905.2 | Scaffold   | 2455.28 | 6771    |
| <i>Eptesicus fuscus</i>             | GCA_000308155.1 | Scaffold   | 2026.63 | 6789    |
| <i>Equus asinus</i>                 | GCA_001305755.1 | Scaffold   | 2391.05 | 2167    |
| <i>Equus caballus</i>               | GCA_002863925.1 | Chromosome | 2506.97 | 4701    |
| <i>Equus przewalskii</i>            | GCA_000696695.1 | Scaffold   | 2395.95 | 53097   |
| <i>Erinaceus europaeus</i>          | GCA_000296755.1 | Scaffold   | 2715.72 | 5803    |
| <i>Eschrichtius robustus</i>        | GCA_002738545.1 | Scaffold   | 2922.98 | 1213011 |
| <i>Esox lucius</i>                  | GCA_000721915.3 | Chromosome | 904.497 | 1211    |
| <i>Eurypyga helias</i>              | GCA_000690775.1 | Scaffold   | 1088.02 | 62699   |
| <i>Falco cherrug</i>                | GCA_000337975.1 | Scaffold   | 1174.81 | 5863    |
| <i>Felis catus</i>                  | GCA_000181335.4 | Chromosome | 2521.86 | 4525    |

|                                     |                  |            |         |         |
|-------------------------------------|------------------|------------|---------|---------|
| <i>Ficedula albicollis</i>          | GCA_000247815.2  | Chromosome | 1118.34 | 21836   |
| <i>Fukomys damarensis</i>           | GCA_000743615.1  | Scaffold   | 2333.89 | 74730   |
| <i>Fulmarus glacialis</i>           | GCA_000690835.1  | Scaffold   | 1141.4  | 57389   |
| <i>Fundulus heteroclitus</i>        | GCA_000826765.1  | Scaffold   | 1021.9  | 10180   |
| <i>Galeopterus variegatus</i>       | GCA_000696425.1  | Scaffold   | 3187.66 | 179514  |
| <i>Gallus gallus</i>                | GCA_000002315.5  | Chromosome | 1065.37 | 525     |
| <i>Gambusia affinis</i>             | GCA_003097735.1  | Scaffold   | 598.663 | 2943    |
| <i>Gavia stellata</i>               | GCA_000690875.1  | Scaffold   | 1129.69 | 61831   |
| <i>Gekko japonicus</i>              | GCA_001447785.1  | Scaffold   | 2490.27 | 191500  |
| <i>Geospiza fortis</i>              | GCA_000277835.1  | Scaffold   | 1065.29 | 27239   |
| <i>Gorilla gorilla gorilla</i>      | GCA_000151905.3  | Chromosome | 3063.36 | 40730   |
| <i>Haliaeetus albicilla</i>         | GCA_000691405.1  | Scaffold   | 1133.55 | 50905   |
| <i>Haliaeetus leucocephalus</i>     | GCA_000737465.1  | Scaffold   | 1178.41 | 1023    |
| <i>Haplochromis burtoni</i>         | GCA_000239415.1  | Scaffold   | 831.412 | 8001    |
| <i>Heterocephalus glaber</i>        | GCA_000247695.1  | Scaffold   | 2618.2  | 4229    |
| <i>Hippocampus comes</i>            | GCA_001891065.1  | Scaffold   | 493.776 | 37377   |
| <i>Hipposideros armiger</i>         | GCA_001890085.1  | Scaffold   | 2236.58 | 7571    |
| <i>Homo sapiens</i>                 | GCA_000001405.27 | Scaffold   | 2911.24 | 125643  |
| <i>Ictalurus punctatus</i>          | GCA_001660625.1  | Chromosome | 783.275 | 9975    |
| <i>Ictidomys tridecemlineatus</i>   | GCA_000236235.1  | Scaffold   | 2478.39 | 12483   |
| <i>Jaculus jaculus</i>              | GCA_000280705.1  | Scaffold   | 2835.25 | 10898   |
| <i>Kryptolebias marmoratus</i>      | GCA_001649575.1  | Scaffold   | 680.367 | 3073    |
| <i>Labrus bergylta</i>              | GCA_900080235.1  | Scaffold   | 805.481 | 13466   |
| <i>Larimichthys crocea</i>          | GCA_000972845.2  | Chromosome | 657.94  | 9998    |
| <i>Lates calcarifer</i>             | GCA_001640805.1  | Scaffold   | 668.481 | 3808    |
| <i>Latimeria chalumnae</i>          | GCA_000225785.1  | Scaffold   | 2860.59 | 22819   |
| <i>Lepidothrix coronata</i>         | GCA_001604755.1  | Scaffold   | 1079.58 | 4612    |
| <i>Lepisosteus oculatus</i>         | GCA_000242695.1  | Chromosome | 945.878 | 2106    |
| <i>Leptonychotes weddellii</i>      | GCA_000349705.1  | Scaffold   | 3156.9  | 16711   |
| <i>Leptosomus discolor</i>          | GCA_000691785.1  | Scaffold   | 1136.24 | 57160   |
| <i>Leucoraja erinacea</i>           | GCA_000238235.1  | Contig     | 1555.46 | 2962366 |
| <i>Limosa lapponica baueri</i>      | GCA_002844005.1  | Scaffold   | 1034.77 | 32319   |
| <i>Lipotes vexillifer</i>           | GCA_000442215.1  | Scaffold   | 2429.21 | 30713   |
| <i>Lonchura striata domestica</i>   | GCA_002197715.1  | Scaffold   | 1060.17 | 3014    |
| <i>Loxodonta africana</i>           | GCA_000001905.1  | Scaffold   | 3196.74 | 2352    |
| <i>Macaca fascicularis</i>          | GCA_000364345.1  | Chromosome | 2946.84 | 7625    |
| <i>Macaca mulatta</i>               | GCA_000772875.3  | Chromosome | 3236.22 | 286263  |
| <i>Macaca nemestrina</i>            | GCA_000956065.1  | Scaffold   | 2948.7  | 9733    |
| <i>Malaclemys terrapin terrapin</i> | GCA_001728815.2  | Contig     | 2439.75 | 21684   |
| <i>Manacus vitellinus</i>           | GCA_001715985.2  | Scaffold   | 1213.15 | 15315   |
| <i>Mandrillus leucophaeus</i>       | GCA_000951045.1  | Scaffold   | 3061.99 | 12821   |
| <i>Manis javanica</i>               | GCA_001685135.1  | Scaffold   | 2547.4  | 80670   |
| <i>Marmota marmota marmota</i>      | GCA_001458135.1  | Scaffold   | 2510.59 | 14543   |
| <i>Maylandia zebra</i>              | GCA_000238955.5  | Chromosome | 957.485 | 1690    |
| <i>Meleagris gallopavo</i>          | GCA_000146605.3  | Chromosome | 1128.34 | 233806  |
| <i>Melopsittacus undulatus</i>      | GCA_000238935.1  | Scaffold   | 1117.37 | 25212   |



|                                                              |                 |            |         |        |
|--------------------------------------------------------------|-----------------|------------|---------|--------|
| <i>Meriones unguiculatus</i>                                 | GCA_002204375.1 | Scaffold   | 2523.12 | 68793  |
| <i>Merops nubicus</i>                                        | GCA_000691845.1 | Scaffold   | 1062.96 | 53499  |
| <i>Mesitornis unicolor</i>                                   | GCA_000695765.1 | Scaffold   | 1087.29 | 67520  |
| <i>Mesocricetus auratus</i>                                  | GCA_000349665.1 | Scaffold   | 2504.93 | 21484  |
| <i>Microcebus murinus</i>                                    | GCA_000165445.3 | Chromosome | 2487.41 | 7678   |
| <i>Microtus ochrogaster</i>                                  | GCA_000317375.1 | Chromosome | 2287.34 | 6450   |
| <i>Miniopterus natalensis</i>                                | GCA_001595765.1 | Scaffold   | 1803.1  | 1269   |
| <i>Monodelphis domestica</i>                                 | GCF_000002295.2 | Chromosome | 3598.44 | 5223   |
| <i>Monopterus albus</i>                                      | GCA_001952655.1 | Scaffold   | 684.144 | 20622  |
| <i>Mus caroli</i>                                            | GCA_900094665.2 | Chromosome | 2553.13 | 3163   |
| <i>Mus musculus</i>                                          | GCA_000001635.8 | Scaffold   | 2505.02 | 2314   |
| <i>Mus pahari</i>                                            | GCA_900095145.2 | Chromosome | 2475.01 | 2581   |
| <i>Mustela putorius furo</i>                                 | GCA_000215625.1 | Scaffold   | 2410.88 | 7783   |
| <i>Myotis brandtii</i>                                       | GCA_000412655.1 | Scaffold   | 2107.24 | 169750 |
| <i>Myotis davidii</i>                                        | GCA_000327345.1 | Scaffold   | 2059.8  | 101769 |
| <i>Myotis lucifugus</i>                                      | GCA_000147115.1 | Scaffold   | 2034.58 | 11654  |
| <i>Nannospalax galili</i>                                    | GCA_000622305.1 | Scaffold   | 3061.42 | 154976 |
| <i>Nanorana parkeri</i>                                      | GCA_000935625.1 | Scaffold   | 2053.87 | 25188  |
| <i>Neolamprologus brichardi</i>                              | GCA_000239395.1 | Scaffold   | 847.91  | 9099   |
| <i>Neomonachus schauinslandi</i>                             | GCA_002201575.1 | Scaffold   | 2400.93 | 7873   |
| <i>Neophocaena asiaeorientalis</i><br><i>asiaeorientalis</i> | GCA_003031525.1 | Scaffold   | 2284.63 | 13699  |
| <i>Neotoma lepida</i>                                        | GCA_001675575.1 | Scaffold   | 2353.86 | 119373 |
| <i>Nestor notabilis</i>                                      | GCA_000696875.1 | Scaffold   | 1053.56 | 42180  |
| <i>Nipponia nippon</i>                                       | GCA_000708225.1 | Scaffold   | 1223.86 | 59555  |
| <i>Nomascus leucogenys</i>                                   | GCA_000146795.3 | Chromosome | 2962.06 | 17524  |
| <i>Nothobranchius furzeri</i>                                | GCA_001465895.2 | Chromosome | 1242.52 | 6013   |
| <i>Notothenia coriiceps</i>                                  | GCA_000735185.1 | Scaffold   | 636.614 | 38657  |
| <i>Numida meleagris</i>                                      | GCA_002078875.2 | Chromosome | 1043.26 | 2739   |
| <i>Ochotona princeps</i>                                     | GCA_000292845.1 | Scaffold   | 2229.84 | 10421  |
| <i>Octodon degus</i>                                         | GCA_000260255.1 | Scaffold   | 2995.89 | 7135   |
| <i>Odobenus rosmarus divergens</i>                           | GCA_000321225.1 | Scaffold   | 2400.15 | 3893   |
| <i>Odocoileus virginianus texanus</i>                        | GCA_002102435.1 | Scaffold   | 2380.51 | 17026  |
| <i>Oncorhynchus kisutch</i>                                  | GCA_002021735.1 | Chromosome | 2369.93 | 22813  |
| <i>Oncorhynchus mykiss</i>                                   | GCA_002163495.1 | Chromosome | 2179    | 139800 |
| <i>Oncorhynchus tshawytscha</i>                              | GCA_002872995.1 | Chromosome | 2425.71 | 15946  |
| <i>Ophiophagus hannah</i>                                    | GCA_000516915.1 | Scaffold   | 1594.07 | 296399 |
| <i>Opisthocomus hoazin</i>                                   | GCA_000692075.1 | Scaffold   | 1203.71 | 10256  |
| <i>Orcinus orca</i>                                          | GCA_000331955.2 | Scaffold   | 2372.92 | 1668   |
| <i>Oreochromis niloticus</i>                                 | GCA_001858045.3 | Chromosome | 1005.68 | 2460   |
| <i>Ornithorhynchus anatinus</i>                              | GCF_000002275.2 | Chromosome | 1995.61 | 200283 |
| <i>Orycteropus afer afer</i>                                 | GCA_000298275.1 | Scaffold   | 4444.08 | 22509  |
| <i>Oryctolagus cuniculus</i>                                 | GCA_000003625.1 | Chromosome | 2737.46 | 3318   |
| <i>Oryzias latipes</i>                                       | GCA_002234675.1 | Chromosome | 734.057 | 25     |
| <i>Oryzias melastigma</i>                                    | GCA_002922805.1 | Scaffold   | 779.47  | 8603   |
| <i>Otolemur garnettii</i>                                    | GCA_000181295.3 | Scaffold   | 2519.72 | 7793   |

|                                       |                 |            |         |         |
|---------------------------------------|-----------------|------------|---------|---------|
| <i>Ovis aries</i>                     | GCA_002742125.1 | Chromosome | 2869.91 | 2641    |
| <i>Ovis aries musimon</i>             | GCA_000765115.1 | Scaffold   | 2589.83 | 6173    |
| <i>Pan paniscus</i>                   | GCA_000258655.2 | Chromosome | 3286.64 | 10984   |
| <i>Pan troglodytes</i>                | GCA_002880755.3 | Chromosome | 3050.4  | 4432    |
| <i>Pan troglodytes verus</i>          | GCA_000002175.2 | Chromosome | 12.2633 | 2       |
| <i>Panthera pardus</i>                | GCA_001857705.1 | Scaffold   | 2578.02 | 50377   |
| <i>Panthera tigris altaica</i>        | GCA_000464555.1 | Scaffold   | 2391.08 | 1479    |
| <i>Pantholops hodgsonii</i>           | GCA_000400835.1 | Scaffold   | 2696.89 | 15059   |
| <i>Papio anubis</i>                   | GCA_000264685.2 | Chromosome | 2959.37 | 71135   |
| <i>Paralichthys olivaceus</i>         | GCA_001970005.2 | Scaffold   | 643.911 | 9525    |
| <i>Paramormyrops kingsleyae</i>       | GCA_002872115.1 | Scaffold   | 799.421 | 4667    |
| <i>Parus major</i>                    | GCA_001522545.3 | Chromosome | 1020.31 | 1675    |
| <i>Pelecanus crispus</i>              | GCA_000687375.1 | Scaffold   | 1160.92 | 63982   |
| <i>Pelodiscus sinensis</i>            | GCA_000230535.1 | Scaffold   | 2202.48 | 19904   |
| <i>Peromyscus maniculatus bairdii</i> | GCA_000500345.1 | Scaffold   | 2630.54 | 30921   |
| <i>Phaethon lepturus</i>              | GCA_000687285.1 | Scaffold   | 1152.96 | 66785   |
| <i>Phalacrocorax carbo</i>            | GCA_000708925.1 | Scaffold   | 1138.97 | 64312   |
| <i>Phascolarctos cinereus</i>         | GCA_002099425.1 | Contig     | 3192.58 | 1907    |
| <i>Phoenicopterus ruber ruber</i>     | GCA_000687265.1 | Scaffold   | 1132.18 | 76189   |
| <i>Physeter catodon</i>               | GCA_002837175.2 | Chromosome | 2512.15 | 14677   |
| <i>Picoides pubescens</i>             | GCA_000699005.1 | Scaffold   | 1167.32 | 31254   |
| <i>Piliocolobus tephrosceles</i>      | GCA_002776525.2 | Scaffold   | 3038.01 | 47449   |
| <i>Podiceps cristatus</i>             | GCA_000699545.1 | Scaffold   | 1134.92 | 82923   |
| <i>Poecilia formosa</i>               | GCA_000485575.1 | Scaffold   | 748.923 | 3985    |
| <i>Poecilia latipinna</i>             | GCA_001443285.1 | Scaffold   | 815.145 | 17988   |
| <i>Poecilia mexicana</i>              | GCA_001443325.1 | Scaffold   | 801.711 | 18105   |
| <i>Poecilia reticulata</i>            | GCA_000633615.2 | Chromosome | 731.622 | 3029    |
| <i>Pogona vitticeps</i>               | GCA_900067755.1 | Scaffold   | 1716.68 | 13749   |
| <i>Pongo abelii</i>                   | GCA_002880775.3 | Chromosome | 3065.05 | 5300    |
| <i>Propithecus coquereli</i>          | GCA_000956105.1 | Scaffold   | 2798.15 | 22539   |
| <i>Protobothrops mucrosquamatus</i>   | GCA_001527695.3 | Scaffold   | 1673.88 | 52280   |
| <i>Pseudopodoces humilis</i>          | GCA_000331425.1 | Scaffold   | 1043    | 5406    |
| <i>Pterocles gutturalis</i>           | GCA_000699245.1 | Scaffold   | 1069.32 | 58607   |
| <i>Pteropus alecto</i>                | GCA_000325575.1 | Scaffold   | 1985.98 | 65598   |
| <i>Pteropus vampyrus</i>              | GCA_000151845.2 | Scaffold   | 2198.28 | 36094   |
| <i>Pundamilia nyererei</i>            | GCA_000239375.1 | Scaffold   | 830.133 | 7236    |
| <i>Pygocentrus nattereri</i>          | GCA_001682695.1 | Scaffold   | 1285.35 | 283518  |
| <i>Pygoscelis adeliae</i>             | GCA_000699105.1 | Scaffold   | 1216.62 | 19265   |
| <i>Python bivittatus</i>              | GCA_000186305.2 | Scaffold   | 1435.05 | 39113   |
| <i>Rana catesbeiana</i>               | GCA_002284835.2 | Scaffold   | 6250.35 | 1544635 |
| <i>Rattus norvegicus</i>              | GCA_000001895.4 | Chromosome | 2870.18 | 1395    |
| <i>Rhincodon typus</i>                | GCA_001642345.2 | Scaffold   | 2931.6  | 57334   |
| <i>Rhinolophus sinicus</i>            | GCA_001888835.1 | Scaffold   | 2073.34 | 63439   |
| <i>Rhinopithecus bieti</i>            | GCA_001698545.1 | Scaffold   | 2977.07 | 105032  |
| <i>Rhinopithecus roxellana</i>        | GCA_000769185.1 | Scaffold   | 2899.55 | 135512  |
| <i>Rousettus aegyptiacus</i>          | GCA_001466805.2 | Scaffold   | 1910.25 | 2490    |

|                                        |                 |            |         |        |
|----------------------------------------|-----------------|------------|---------|--------|
| <i>Saimiri boliviensis boliviensis</i> | GCA_000235385.1 | Scaffold   | 2608.59 | 2686   |
| <i>Salmo salar</i>                     | GCA_000233375.4 | Chromosome | 2966.89 | 241573 |
| <i>Salvelinus alpinus</i>              | GCA_002910315.2 | Chromosome | 2169.55 | 16702  |
| <i>Sarcophilus harrisii</i>            | GCA_000189315.1 | Scaffold   | 3174.69 | 35974  |
| <i>Scleropages formosus</i>            | GCA_001624265.1 | Scaffold   | 777.359 | 4819   |
| <i>Scophthalmus maximus</i>            | GCA_003186165.1 | Chromosome | 524.979 | 22     |
| <i>Serinus canaria</i>                 | GCA_000534875.1 | Scaffold   | 1152.1  | 304400 |
| <i>Seriola dumerili</i>                | GCA_002260705.1 | Scaffold   | 677.686 | 34656  |
| <i>Seriola lalandi dorsalis</i>        | GCA_002814215.1 | Scaffold   | 732.51  | 99598  |
| <i>Sinocyclocheilus anshuiensis</i>    | GCA_001515605.1 | Scaffold   | 1632.72 | 85682  |
| <i>Sinocyclocheilus grahami</i>        | GCA_001515645.1 | Scaffold   | 1750.29 | 31277  |
| <i>Sinocyclocheilus rhinoceros</i>     | GCA_001515625.1 | Scaffold   | 1655.79 | 164173 |
| <i>Sorex araneus</i>                   | GCA_000181275.2 | Scaffold   | 2423.16 | 12845  |
| <i>Stegastes partitus</i>              | GCA_000690725.1 | Scaffold   | 800.492 | 5818   |
| <i>Struthio camelus australis</i>      | GCA_000698965.1 | Scaffold   | 1225.04 | 6915   |
| <i>Sturnus vulgaris</i>                | GCA_001447265.1 | Scaffold   | 1036.76 | 2361   |
| <i>Sus scrofa</i>                      | GCA_000003025.6 | Chromosome | 2501.91 | 706    |
| <i>Taeniopygia guttata</i>             | GCA_000151805.2 | Chromosome | 1232.14 | 37422  |
| <i>Takifugu rubripes</i>               | GCA_000180615.2 | Chromosome | 391.485 | 7091   |
| <i>Tauraco erythrolophus</i>           | GCA_000709365.1 | Scaffold   | 1155.54 | 59587  |
| <i>Terrapene mexicana triunguis</i>    | GCA_002925995.2 | Scaffold   | 2571.27 | 52260  |
| <i>Tetraodon nigroviridis</i>          | GCA_000180735.1 | Scaffold   | 342.403 | 25773  |
| <i>Thamnophis sirtalis</i>             | GCA_001077635.2 | Scaffold   | 1424.9  | 7930   |
| <i>Theropithecus gelada</i>            | GCA_003255815.1 | Chromosome | 2889.63 | 15308  |
| <i>Tinamus guttatus</i>                | GCA_000705375.2 | Scaffold   | 1047.06 | 82514  |
| <i>Trichechus manatus latirostris</i>  | GCA_000243295.1 | Scaffold   | 3103.81 | 6323   |
| <i>Tupaia chinensis</i>                | GCA_000334495.1 | Scaffold   | 2846.58 | 50750  |
| <i>Tursiops truncatus</i>              | GCA_001922835.1 | Scaffold   | 2132.52 | 2648   |
| <i>Tyto alba</i>                       | GCA_000687205.1 | Scaffold   | 1120.14 | 62122  |
| <i>Ursus maritimus</i>                 | GCA_000687225.1 | Scaffold   | 2301.38 | 23819  |
| <i>Vicugna pacos</i>                   | GCA_000164845.3 | Scaffold   | 2172.21 | 276725 |
| <i>Xenopus laevis</i>                  | GCA_001663975.1 | Chromosome | 2718.43 | 108033 |
| <i>Xenopus tropicalis</i>              | GCA_000004195.3 | Chromosome | 1440.4  | 6822   |
| <i>Xiphophorus maculatus</i>           | GCA_002775205.2 | Chromosome | 704.321 | 102    |
| <i>Zonotrichia albicollis</i>          | GCA_000385455.1 | Scaffold   | 1052.6  | 6018   |

**Table S5. The *wcs* genes in representative mammals**

| <b>Order</b>    | <b>Species Name</b>               | <b>Assembly No.</b> | <b>Accession No. of annotated proteins</b> | <b>The <i>wcs1/wcs2</i> gene location</b> |
|-----------------|-----------------------------------|---------------------|--------------------------------------------|-------------------------------------------|
| Carnivora       | <i>Mustela putorius</i>           | GCF_000215625.1     | XP_004767240.1                             | NW_004569271.1; 511191-517139             |
|                 | <i>Gulo gulo</i>                  | GCA_900006375.1     | -                                          | CYRY01007490.1; 30570-31445               |
|                 | <i>Neomonachus schauinslandi</i>  | GCF_002201575.1     | XP_021537091.1                             | NW_018734283.1; 5480286-5485923           |
|                 | <i>Ursus maritimus</i>            | GCF_000687225.1     | XP_008682926.1                             | NW_007907049.1; 194187-199842             |
|                 | <i>Canis lupus</i>                | GCF_000002285.3     | XP_013970526.1                             | NC_006583.3; 106044100-106050204          |
|                 | <i>Lycaon pictus</i>              | GCA_001887905.1     | -                                          | CM007565.1; 106017032-106017963           |
|                 | <i>Felis catus</i>                | GCF_000181335.3     | XP_023100688.1                             | NC_018737.3; 7510146-7515634              |
| Perissodactyla  | <i>Panthera pardus</i>            | GCF_001857705.1     | XP_019281070.1                             | NW_017619948.1; 1531829-1537015           |
|                 | <i>Equus asinus</i>               | GCF_001305755.1     | XP_014719200.1                             | NW_014638281.1; 7411040-7419383           |
|                 | <i>Equus przewalskii</i>          | GCF_000696695.1     | XP_008505767.1                             | NW_007678110.1; 72459-75543               |
|                 | <i>Tursiops aduncus</i>           | GCA_003227395.1     | -                                          | NCQN01016172.1; 132659-133487             |
|                 | <i>Lipotes vexillifer</i>         | GCF_000442215.1     | XP_007463474.1                             | NW_006790237.1; 1991729-1992565           |
| Cetartiodactyla | <i>Balaenoptera acutorostrata</i> | GCF_000493695.1     | XP_007179977.1                             | NW_006726699.1; 2079862-2086128           |
|                 | <i>Ovis aries</i>                 | GCF_000765115.1     | XP_014944740.1                             | NC_019471.2; 55792422-55797540            |
|                 | <i>Capra hircus</i>               | GCF_001704415.1     | XP_017918366.1                             | NC_030825.1; 57960701-57967132            |
|                 | <i>Bos taurus</i>                 | GCF_002263795.1     | NP_001039692.2                             | NC_037345.1; 56859876-56866365            |
|                 | <i>Bison bison</i>                | GCF_000754665.1     | XP_010847965.1                             | NW_011494857.1; 2180321-2187416           |

|            |                                |                 |                |                                                                         |
|------------|--------------------------------|-----------------|----------------|-------------------------------------------------------------------------|
|            | <i>Elaphurus davidianus</i>    | GCA_002443075.1 | -              | JRFZ01026799.1; 349692-350516                                           |
|            | <i>Camelus bactrianus</i>      | GCF_000767855.1 | XP_010945334.1 | NW_011511555.1; 5218030-5224219                                         |
|            | <i>Vicugna pacos</i>           | GCA_000767525.1 | XP_015098307.1 | NW_005882787.1; 1977864-1984143                                         |
|            | <i>Rhinolophus sinicus</i>     | GCF_001888835.1 | XP_019597236.1 | NW_017739093.1; 110007-115759                                           |
| Chiroptera | <i>Hipposideros armiger</i>    | GCF_001890085.1 | XP_019513661.1 | NW_017731633.1; 2162321-2171724                                         |
|            | <i>Pteropus alecto</i>         | GCF_000325575.1 | XP_006905058.1 | NW_006430464.1; 797058-801909                                           |
|            | <i>Mus musculus</i>            | GCA_000001635.8 | NP_080156.2    | NC_000073.6; 44246720-44252319                                          |
|            | <i>Apodemus sylvaticus</i>     | GCA_001305905.1 | -              | LIPJ01004130.1; 41554-42407                                             |
|            | <i>Microtus agrestis</i>       | GCA_001305995.1 | -              | LIQJ01000765.1; 69196-70049                                             |
|            | <i>Cricetulus griseus</i>      | GCF_000223135.1 | XP_003510246.3 | NW_003614844.1; 195628-202136                                           |
| Rodentia   | <i>Nannospalax galili</i>      | GCA_000622305.1 | XP_008843388.1 | NW_008348313.1; 2489091-2494924                                         |
|            | <i>Jaculus jaculus</i>         | GCA_000280705.1 | XP_004672622.1 | NW_004504511.1; 768201-769049                                           |
|            | <i>Marmota marmota</i>         | GCA_001458135.1 | XP_015351935.1 | NW_015351255.1; 450486-454453                                           |
|            | <i>Cavia aperea</i>            | GCA_000688575.1 | -              | No wcs1/wcs2                                                            |
|            | <i>Cavia porcellus</i>         | GCA_000151735.1 | -              | No wcs1/wcs2                                                            |
|            | <i>Macaca mulatta</i>          | GCF_000772875.2 | -              | NC_027911.1; 46166071-46166355 and 46166414-46166671                    |
| Primates   | <i>Cercocebus atys</i>         | GCF_000955945.1 | -              | NW_012001739.1; 6350532-6351125                                         |
|            | <i>Chlorocebus sabaues</i>     | GCF_000409795.2 | -              | NC_023647.1; 43847003-43847299                                          |
|            | <i>Rhinopithecus roxellana</i> | GCF_000769185.1 | -              | NW_010809787.1; 1662238-1662426 and 1662510-1662580 and 1662530-1662828 |

|                 |                               |                  |                |                                                                         |
|-----------------|-------------------------------|------------------|----------------|-------------------------------------------------------------------------|
|                 | <i>Colobus angolensis</i>     | GCF_000951035.1  | -              | NW_012115710.1; 3111987-3112148 and 3112204-3112488                     |
|                 | <i>Homo sapiens</i>           | GCF_000001405.38 | -              | NC_000019.10; 50798339-50798451 and 50798544-50798837                   |
|                 | <i>Callithrix jacchus</i>     | GCF_000004665.1  | -              | NC_013917.1; 42634234-42634377 and 42634383-42634724                    |
|                 | <i>Eulemur macaco</i>         | GCA_001262655.1  | -              | LGHX01005996.1; 263684-263804 and 263948-264217                         |
|                 | <i>Prolemur simus</i>         | GCA_003258685.1  | -              | MPIZ01000407.1; 672236-672607 and 672648-672827                         |
| Dermoptera      | <i>Galeopterus variegatus</i> | GCF_000696425.1  | -              | NW_007734068.1; 62183-62605                                             |
| Afrosoricida    | <i>Echinops telfairi</i>      | GCF_000313985.1  | -              | NW_004558746.1; 16030568-16031425                                       |
|                 | <i>Chrysochloris asiatica</i> | GCF_000296735.1  | -              | No wcs1/wcs2                                                            |
| Macroscelidea   | <i>Elephantulus edwardii</i>  | GCF_000299155.1  | -              | No wcs1/wcs2                                                            |
| Sirenia         | <i>Trichechus manatus</i>     | GCF_000243295.1  | -              | NW_004444023.1; 5916284-5916649 and 5916658-5916744 and 5916737-5917069 |
| Proboscidea     | <i>Loxodonta africana</i>     | GCF_000001905.1  | -              | NW_003573424.1; 10634710-10635076                                       |
| Pilosa          | <i>Choloepus hoffmanni</i>    | GCA_000164785.2  | -              | KN189048.1; 212821-213123                                               |
| Cingulata       | <i>Dasybus novemcinctus</i>   | GCF_000208655.1  | -              | NW_004499039.1; 142598-142954 and 142947-143447                         |
|                 | <i>Phascolarctos cinereus</i> | GCF_002099425.1  | XP_020862835.1 | NW_018344070.1; 2529148-2530875                                         |
| Diprotodontia   | <i>Vombatus ursinus</i>       | GCA_900497805.1  | -              | UNPS01001419.1; 22363703-22365057 and 22365071-22365397                 |
|                 | <i>Notamacropus eugenii</i>   | GCA_000004035.1  | -              | GL053672.1; 6548-8113 and 8124-8330                                     |
| Dasyuromorphia  | <i>Sarcophilus harrisii</i>   | GCF_000189315.1  | -              | NW_003831580.1; 2019579-2021139                                         |
| Didelphimorphia | <i>Monodelphis domestica</i>  | GCF_000002295.2  | XP_007493718.1 | NC_008804.1; 73129202-73135896                                          |

---

**Table S6. Sequences used for inferring the phylogenetic tree of ACP proteins**

| <b>Order</b>    | <b>Species Name</b>           | <b>Accession No.</b> | <b>Annotation</b> |
|-----------------|-------------------------------|----------------------|-------------------|
| Carnivora       | <i>Mustela putorius</i>       | XP_012919578.1       | ACPT              |
|                 |                               | XP_004763128.1       | ACP2              |
|                 |                               | XP_004762560.1       | ACPP              |
|                 |                               | XP_004779679.1       | ACP6              |
| Perissodactyla  | <i>Equus asinus</i>           | XP_014718797.1       | ACPT              |
|                 |                               | XP_014716804.1       | ACP2              |
|                 |                               | XP_014713490.1       | ACPP              |
|                 |                               | XP_014722553.1       | ACP6              |
| Chiroptera      | <i>Pteropus alecto</i>        | XP_006905160.1       | ACP4              |
|                 |                               | XP_024899878.1       | ACP2              |
|                 |                               | XP_006907308.2       | ACPP              |
|                 |                               | XP_006919758.1       | ACP6              |
| Cetartiodactyla | <i>Bos taurus</i>             | NP_001193896.1       | ACP4              |
|                 |                               | XP_005216540.1       | ACP2              |
|                 |                               | NP_001092336.1       | ACPP              |
|                 |                               | NP_001092843.1       | ACP6              |
| Rodentia        | <i>Mus musculus</i>           | NP_001181963.1       | ACP4              |
|                 |                               | XP_011249074.2       | ACPT              |
|                 |                               | NP_031413.1          | ACP2              |
|                 |                               | NP_997551.1          | ACPP              |
|                 |                               | NP_062774.2          | ACP6              |
| Primates        | <i>Homo sapiens</i>           | NP_149059.1          | ACP4              |
|                 |                               | NP_001601.1          | ACP2              |
|                 |                               | NP_001127666.1       | ACPP              |
|                 |                               | NP_057445.4          | ACP6              |
| Dermoptera      | <i>Galeopterus variegatus</i> | XP_008590706.1       | ACPT              |
|                 |                               | XP_008572913.1       | ACP2              |
|                 |                               | XP_008582843.1       | ACPP              |
|                 |                               | XP_008584870.1       | ACP6              |
| Afrosoricida    | <i>Echinops telfairi</i>      | XP_004710509.1       | ACPT              |
|                 |                               | XP_004708405.1       | ACP2              |
|                 |                               | XP_004704234.1       | ACPP              |
|                 |                               | XP_004717322.1       | ACP6              |
| Afrosoricida    | <i>Chrysochloris asiatica</i> | XP_006868200.1       | ACPT              |
|                 |                               | XP_006865134.1       | ACP2              |
|                 |                               | XP_006846702.1       | ACPP              |
|                 |                               | XP_006861753.1       | ACP6              |
| Macroscelidea   | <i>Elephantulus edwardii</i>  | XP_006897413.1       | ACPT              |

|             |                             |                |                          |
|-------------|-----------------------------|----------------|--------------------------|
|             |                             | XP_006896764.1 | ACP2                     |
|             |                             | XP_006902611.1 | ACPP                     |
|             |                             | XP_006899586.1 | ACP6                     |
| Sirenia     | <i>Trichechus manatus</i>   | XP_004381771.1 | LOC101344314 (ACPT/ACP4) |
|             |                             | XP_004387749.1 | LOC101351012 (ACP2)      |
|             |                             | XP_012412448.1 | LOC101348525 (ACPP)      |
|             |                             | XP_004380386.1 | LOC101355450 (ACP6)      |
| Proboscidea | <i>Loxodonta africana</i>   | XP_003406888.1 | ACP4                     |
|             |                             | XP_003412297.2 | ACP2                     |
|             |                             | XP_003420955.2 | ACPP                     |
|             |                             | XP_010599619.1 | ACP6                     |
| Cingulata   | <i>Dasybus novemcinctus</i> | XP_004458002.1 | ACP2                     |
|             |                             | XP_023444307.1 | ACPP                     |
|             |                             | XP_023441314.1 | ACP4                     |
|             |                             | XP_004469024.1 | ACP6                     |
